# Supplementary material
Source: publisher figshare collection journal article supplement (https://springernature.figshare.com/ndownloader/files/17297510)
Supplement: Supplementary file 1 [file 17297510]

## Sheet: Read me
Methods for generating the final included species list for this systematic map
The Partners in Flight (PIF) initiative: (https://www.partnersinflight.org/) has already classified all 772 bird species that breed in the US and Canada to a number of broad "habitat types". This information is available in a downloadable spreadsheet associated with PIF's "Avian Conservation Assessment Database" (ACAD) at: http://pif.birdconservancy.org/ACAD/ . Descriptions of PIF's "breeding hab…
We took the following 4 steps to generate a final list of 153 species to be included in this systematic map that have large portions of their breeding distribution within eastern temperate or boreal forests of North America. To be included in this systematic map, a study must present data for one or more of the species on this list. Studies that do not include information about one of the 153 spe…
1: We excluded 256 species that PIF classified as either shorebirds (with one exception, below), waterbirds, or waterfowl, and retained 464 species that PIF classified as landbirds. We added American Woodcock to our list of included species. While this species can be classified a shorebird based on taxonomy, it breeds extensively in forested areas within our study extent and specific forest manag…
2: We further narrowed our intial list of 465 landbird species that breed in the US and/or Canada to include only the 244 species that had one or more of the following values listed in the "breeding habitat description" field of the PIF spreadsheet referenced above: 1) temperate western forests, 2) temperate eastern forests, 3) boreal forests, 4) forest generalist, and 5) generalist
3: We excluded 74 species from this revised list because their distribution was either entirely, or very close to entirely, constrained to temperate western forests, which were outside the scope of this review.
4: We then excluded an additional 16 species that: 1) have their primary breeding distribution outside of eastern temperate or boreal forest (e.g., tundra, grassland), AND 2) do not breed widely within either eastern temperate and/or boreal forests. For example, we excluded willow ptarmigan, who breed primarily in arctic tundra and are not widely distributed within boreal forest. In contrast, we …
Properties of the final species list:
1: Includes 42 species that breed exclusively in eastern temperate forests.
2: Includes 23 species that breed exclusively in boreal forests (8 of which also breed outside of North America in Eurasian boreal forests).
3. Includes 17 species that breed exclusively in BOTH eastern temperate forests and boreal forests, but in no other type.
4. Includes 62 species that breed in either eastern temperate and/or boreal forests that ALSO breed in western temperate forests. For these species, we will only include studies from within our ecologically defined spatial extent (see map to right). We will not include studies that present information for these species from western temperate forests, central grasslands, tundra, or any other areas…
5. Includes 9 species that breed in either eastern temperate and/or boreal forests, as well as other areas outside of our study extent that are not western temperate forest.

## Sheet: Included bird species
aos_59 taxa number	Included	Common Name	Scientific Name	Partners in Flight "breeding habitat descriptions"	Also in western temperate forests	Also in Eurasian Boreal forests
99	Yes	Northern Bobwhite	Colinus virginianus	Temperate eastern forests; Tropical dry forests; Temperate grasslands; Tropical grasslands; Agricultural
125	Yes	Ruffed Grouse	Bonasa umbellus	Boreal forests; Temperate eastern forests; Temperate western forests	1
128	Yes	Spruce Grouse	Falcipennis canadensis	Boreal forests
134	Yes	Sharp-tailed Grouse	Tympanuchus phasianellus	Temperate grasslands; Boreal forests; Agricultural
137	Yes	Wild Turkey	Meleagris gallopavo	Forest generalist	1
205	Yes	Yellow-billed Cuckoo	Coccyzus americanus	Temperate eastern forests; Tropical dry forests; Temperate western forests	1
209	Yes	Black-billed Cuckoo	Coccyzus erythropthalmus	Boreal forests; Temperate eastern forests
236	Yes	Chuck-will's-widow	Antrostomus carolinensis	Temperate eastern forests; Tropical dry forests
242	Yes	Eastern Whip-poor-will	Antrostomus vociferus	Temperate eastern forests
260	Yes	Chimney Swift	Chaetura pelagica	Temperate eastern forests
332	Yes	Ruby-throated Hummingbird	Archilochus colubris	Temperate eastern forests
512	Yes	American Woodcock	Scolopax minor	Temperate eastern forests
775	Yes	Swallow-tailed Kite	Elanoides forficatus	Temperate eastern forests; Tropical evergreen forests
789	Yes	Sharp-shinned Hawk	Accipiter striatus	Forest generalist	1
790	Yes	Cooper's Hawk	Accipiter cooperii	Forest generalist	1
793	Yes	Northern Goshawk	Accipiter gentilis	Forest generalist	1
798	Yes	Mississippi Kite	Ictinia mississippiensis	Temperate eastern forests
818	Yes	Red-shouldered Hawk	Buteo lineatus	Temperate eastern forests; Temperate western forests	1
820	Yes	Broad-winged Hawk	Buteo platypterus	Boreal forests; Temperate eastern forests
825	Yes	Red-tailed Hawk	Buteo jamaicensis	Generalist	1
833	Yes	Eastern Screech-Owl	Megascops asio	Temperate eastern forests; Tropical dry forests
845	Yes	Great Horned Owl	Bubo virginianus	Generalist	1
847	Yes	Northern Hawk Owl	Surnia ulula	Boreal forests		1
860	Yes	Barred Owl	Strix varia	Forest generalist	1
862	Yes	Great Gray Owl	Strix nebulosa	Boreal forests		1
863	Yes	Long-eared Owl	Asio otus	Forest generalist	1
868	Yes	Boreal Owl	Aegolius funereus	Boreal forests		1
869	Yes	Northern Saw-whet Owl	Aegolius acadicus	Forest generalist	1
938	Yes	Red-headed Woodpecker	Melanerpes erythrocephalus	Temperate eastern forests
951	Yes	Red-bellied Woodpecker	Melanerpes carolinus	Temperate eastern forests
954	Yes	Yellow-bellied Sapsucker	Sphyrapicus varius	Temperate eastern forests; Boreal forests
958	Yes	American Three-toed Woodpecker	Picoides dorsalis	Boreal forests
959	Yes	Black-backed Woodpecker	Picoides arcticus	Boreal forests
961	Yes	Downy Woodpecker	Dryobates pubescens	Forest generalist	1
964	Yes	Red-cockaded Woodpecker	Dryobates borealis	Temperate eastern forests
965	Yes	Hairy Woodpecker	Dryobates villosus	Forest generalist	1
977	Yes	Northern Flicker	Colaptes auratus	Forest generalist	1
983	Yes	Pileated Woodpecker	Dryocopus pileatus	Temperate eastern forests; Temperate western forests	1
1000	Yes	Merlin	Falco columbarius	Generalist	1
1006	Yes	Peregrine Falcon	Falco peregrinus	Generalist	1
1249	Yes	Great Crested Flycatcher	Myiarchus crinitus	Temperate eastern forests
1278	Yes	Eastern Kingbird	Tyrannus tyrannus	Temperate grasslands; Temperate eastern forests; Agricultural
1291	Yes	Olive-sided Flycatcher	Contopus cooperi	Boreal forests; Temperate western forests	1
1296	Yes	Eastern Wood-Pewee	Contopus virens	Temperate eastern forests
1302	Yes	Yellow-bellied Flycatcher	Empidonax flaviventris	Boreal forests; Temperate eastern forests
1303	Yes	Acadian Flycatcher	Empidonax virescens	Temperate eastern forests
1304	Yes	Alder Flycatcher	Empidonax alnorum	Boreal forests; Temperate eastern forests
1305	Yes	Willow Flycatcher	Empidonax traillii	Temperate eastern forests; Temperate western forests	1
1307	Yes	Least Flycatcher	Empidonax minimus	Temperate eastern forests; Boreal forests
1318	Yes	Eastern Phoebe	Sayornis phoebe	Temperate eastern forests
1340	Yes	White-eyed Vireo	Vireo griseus	Temperate eastern forests
1352	Yes	Yellow-throated Vireo	Vireo flavifrons	Temperate eastern forests
1355	Yes	Blue-headed Vireo	Vireo solitarius	Boreal forests; Temperate eastern forests
1357	Yes	Philadelphia Vireo	Vireo philadelphicus	Boreal forests
1358	Yes	Warbling Vireo	Vireo gilvus	Temperate eastern forests; Temperate western forests	1
1360	Yes	Red-eyed Vireo	Vireo olivaceus	Temperate eastern forests; Boreal forests; Temperate western forests	1
1364	Yes	Canada Jay	Perisoreus canadensis	Boreal forests
1382	Yes	Blue Jay	Cyanocitta cristata	Temperate eastern forests
1435	Yes	Carolina Chickadee	Poecile carolinensis	Temperate eastern forests
1436	Yes	Black-capped Chickadee	Poecile atricapillus	Temperate eastern forests; Boreal forests; Temperate western forests	1
1440	Yes	Boreal Chickadee	Poecile hudsonicus	Boreal forests
1441	Yes	Gray-headed Chickadee	Poecile cinctus	Boreal forests		1
1445	Yes	Tufted Titmouse	Baeolophus bicolor	Temperate eastern forests
1449	Yes	Red-breasted Nuthatch	Sitta canadensis	Boreal forests; Temperate western forests; Temperate eastern forests	1
1450	Yes	White-breasted Nuthatch	Sitta carolinensis	Temperate eastern forests; Temperate western forests; Mexican pine-oak forests	1
1452	Yes	Brown-headed Nuthatch	Sitta pusilla	Temperate eastern forests
1453	Yes	Brown Creeper	Certhia americana	Forest generalist	1
1461	Yes	House Wren	Troglodytes aedon	Forest generalist	1
1467	Yes	Winter Wren	Troglodytes hiemalis	Boreal forests; Temperate eastern forests
1471	Yes	Carolina Wren	Thryothorus ludovicianus	Temperate eastern forests
1506	Yes	Blue-gray Gnatcatcher	Polioptila caerulea	Temperate eastern forests; Temperate western forests	1
1517	Yes	Golden-crowned Kinglet	Regulus satrapa	Boreal forests; Temperate western forests; Temperate eastern forests; Mexican highland forests	1
1518	Yes	Ruby-crowned Kinglet	Regulus calendula	Boreal forests; Temperate western forests	1
1557	Yes	Eastern Bluebird	Sialia sialis	Temperate eastern forests; Mexican pine-oak forests; Pine-oak forests
1580	Yes	Veery	Catharus fuscescens	Temperate eastern forests; Boreal forests; Temperate western forests	1
1581	Yes	Gray-cheeked Thrush	Catharus minimus	Boreal forests		1
1582	Yes	Bicknell's Thrush	Catharus bicknelli	Boreal forests
1583	Yes	Swainson's Thrush	Catharus ustulatus	Boreal forests; Temperate western forests	1
1584	Yes	Hermit Thrush	Catharus guttatus	Temperate eastern forests; Boreal forests; Temperate western forests	1
1585	Yes	Wood Thrush	Hylocichla mustelina	Temperate eastern forests
1603	Yes	American Robin	Turdus migratorius	Forest generalist	1
1609	Yes	Varied Thrush	Ixoreus naevius	Temperate western forests; Boreal forests	1
1614	Yes	Gray Catbird	Dumetella carolinensis	Temperate eastern forests; Temperate western forests	1
1622	Yes	Brown Thrasher	Toxostoma rufum	Temperate eastern forests
1637	Yes	Bohemian Waxwing	Bombycilla garrulus	Boreal forests		1
1638	Yes	Cedar Waxwing	Bombycilla cedrorum	Forest generalist	1
1701	Yes	Evening Grosbeak	Coccothraustes vespertinus	Boreal forests; Temperate western forests; Mexican pine-oak forests	1
1743	Yes	Pine Grosbeak	Pinicola enucleator	Boreal forests		1
1749	Yes	House Finch	Haemorhous mexicanus	Generalist	1
1750	Yes	Purple Finch	Haemorhous purpureus	Boreal forests; Temperate western forests; Temperate eastern forests	1
1757	Yes	Red Crossbill	Loxia curvirostra	Temperate western forests; Mexican pine-oak forests; Temperate eastern forests; Pine forests	1	1
1760	Yes	White-winged Crossbill	Loxia leucoptera	Boreal forests		1
1763	Yes	Pine Siskin	Spinus pinus	Boreal forests; Temperate western forests; Mexican pine-oak forests	1
1771	Yes	American Goldfinch	Spinus tristis	Temperate eastern forests; Temperate western forests	1
1806	Yes	Eastern Towhee	Pipilo erythrophthalmus	Temperate eastern forests
1825	Yes	Bachman's Sparrow	Peucaea aestivalis	Temperate eastern forests
1829	Yes	Chipping Sparrow	Spizella passerina	Forest generalist	1
1832	Yes	Field Sparrow	Spizella pusilla	Temperate eastern forests
1851	Yes	Fox Sparrow	Passerella iliaca	Boreal forests; Temperate western forests	1
1852	Yes	Song Sparrow	Melospiza melodia	Generalist	1
1853	Yes	Lincoln's Sparrow	Melospiza lincolnii	Boreal forests; Temperate western forests	1
1856	Yes	White-throated Sparrow	Zonotrichia albicollis	Boreal forests
1858	Yes	White-crowned Sparrow	Zonotrichia leucophrys	Arctic tundra; Boreal forests; Temperate western forests	1
1861	Yes	Dark-eyed Junco	Junco hyemalis	Boreal forests; Temperate western forests; Temperate eastern forests	1
1885	Yes	Yellow-breasted Chat	Icteria virens	Temperate eastern forests; Temperate western forests	1
1909	Yes	Orchard Oriole	Icterus spurius	Temperate eastern forests
1922	Yes	Baltimore Oriole	Icterus galbula	Temperate eastern forests
1937	Yes	Rusty Blackbird	Euphagus carolinus	Boreal forests
1947	Yes	Ovenbird	Seiurus aurocapilla	Temperate eastern forests; Boreal forests; Temperate western forests	1
1948	Yes	Worm-eating Warbler	Helmitheros vermivorum	Temperate eastern forests
1949	Yes	Louisiana Waterthrush	Parkesia motacilla	Temperate eastern forests
1950	Yes	Northern Waterthrush	Parkesia noveboracensis	Boreal forests; Temperate western forests; Temperate eastern forests	1
1952	Yes	Golden-winged Warbler	Vermivora chrysoptera	Temperate eastern forests
1953	Yes	Blue-winged Warbler	Vermivora cyanoptera	Temperate eastern forests
1954	Yes	Black-and-white Warbler	Mniotilta varia	Temperate eastern forests; Boreal forests
1955	Yes	Prothonotary Warbler	Protonotaria citrea	Temperate eastern forests
1956	Yes	Swainson's Warbler	Limnothlypis swainsonii	Temperate eastern forests
1959	Yes	Tennessee Warbler	Oreothlypis peregrina	Boreal forests
1960	Yes	Orange-crowned Warbler	Oreothlypis celata	Temperate western forests; Boreal forests	1
1963	Yes	Nashville Warbler	Oreothlypis ruficapilla	Boreal forests; Temperate western forests; Temperate eastern forests	1
1966	Yes	Connecticut Warbler	Oporornis agilis	Boreal forests
1969	Yes	Mourning Warbler	Geothlypis philadelphia	Boreal forests; Temperate eastern forests
1970	Yes	Kentucky Warbler	Geothlypis formosa	Temperate eastern forests
1976	Yes	Common Yellowthroat	Geothlypis trichas	Generalist	1
1982	Yes	Hooded Warbler	Setophaga citrina	Temperate eastern forests
1983	Yes	American Redstart	Setophaga ruticilla	Temperate eastern forests; Boreal forests; Temperate western forests	1
1984	Yes	Kirtland's Warbler	Setophaga kirtlandii	Temperate eastern forests
1985	Yes	Cape May Warbler	Setophaga tigrina	Boreal forests
1986	Yes	Cerulean Warbler	Setophaga cerulea	Temperate eastern forests
1987	Yes	Northern Parula	Setophaga americana	Temperate eastern forests; Boreal forests
1989	Yes	Magnolia Warbler	Setophaga magnolia	Boreal forests; Temperate eastern forests
1990	Yes	Bay-breasted Warbler	Setophaga castanea	Boreal forests
1991	Yes	Blackburnian Warbler	Setophaga fusca	Boreal forests; Temperate eastern forests
1992	Yes	Yellow Warbler	Setophaga petechia	Temperate eastern forests; Boreal forests; Temperate western forests	1
1993	Yes	Chestnut-sided Warbler	Setophaga pensylvanica	Temperate eastern forests; Boreal forests
1994	Yes	Blackpoll Warbler	Setophaga striata	Boreal forests
1995	Yes	Black-throated Blue Warbler	Setophaga caerulescens	Boreal forests; Temperate eastern forests
1996	Yes	Palm Warbler	Setophaga palmarum	Boreal forests
1998	Yes	Pine Warbler	Setophaga pinus	Temperate eastern forests
1999	Yes	Yellow-rumped Warbler	Setophaga coronata	Boreal forests; Temperate western forests; Temperate eastern forests	1
2000	Yes	Yellow-throated Warbler	Setophaga dominica	Temperate eastern forests
2003	Yes	Prairie Warbler	Setophaga discolor	Temperate eastern forests
2009	Yes	Townsend's Warbler	Setophaga townsendi	Temperate western forests; Boreal forests	1
2012	Yes	Black-throated Green Warbler	Setophaga virens	Boreal forests; Temperate eastern forests
2022	Yes	Canada Warbler	Cardellina canadensis	Boreal forests; Temperate eastern forests
2023	Yes	Wilson's Warbler	Cardellina pusilla	Boreal forests; Temperate western forests	1
2033	Yes	Summer Tanager	Piranga rubra	Temperate eastern forests; Temperate western forests	1
2034	Yes	Scarlet Tanager	Piranga olivacea	Temperate eastern forests
2047	Yes	Northern Cardinal	Cardinalis cardinalis	Temperate eastern forests; Tropical dry forests; Desert scrub
2051	Yes	Rose-breasted Grosbeak	Pheucticus ludovicianus	Temperate eastern forests
2058	Yes	Blue Grosbeak	Passerina caerulea	Temperate eastern forests; Tropical dry forests; Temperate western forests	1
2060	Yes	Indigo Bunting	Passerina cyanea	Temperate eastern forests
2064	Yes	Painted Bunting	Passerina ciris	Temperate eastern forests; Desert scrub

## Sheet: Candidate bird species
aos_59 taxa number	Included	Common Name	Scientific Name	Partners in Flight "breeding habitat descriptions"	Also in western temperate forests	Also in Eurasian Boreal forests
94	No	Mountain Quail	Oreortyx pictus	Temperate western forests
99	Yes	Northern Bobwhite	Colinus virginianus	Temperate eastern forests; Tropical dry forests; Temperate grasslands; Tropical grasslands; Agricultural
125	Yes	Ruffed Grouse	Bonasa umbellus	Boreal forests; Temperate eastern forests; Temperate western forests	1
128	Yes	Spruce Grouse	Falcipennis canadensis	Boreal forests
132	No	Dusky Grouse	Dendragapus obscurus	Temperate western forests
133	No	Sooty Grouse	Dendragapus fuliginosus	Temperate western forests
134	Yes	Sharp-tailed Grouse	Tympanuchus phasianellus	Temperate grasslands; Boreal forests; Agricultural
137	Yes	Wild Turkey	Meleagris gallopavo	Forest generalist	1
156	No	Band-tailed Pigeon	Patagioenas fasciata	Temperate western forests; Mexican pine-oak forests; Cloud forests; Montane evergreen forests
205	Yes	Yellow-billed Cuckoo	Coccyzus americanus	Temperate eastern forests; Tropical dry forests; Temperate western forests	1
209	Yes	Black-billed Cuckoo	Coccyzus erythropthalmus	Boreal forests; Temperate eastern forests
228	No	Antillean Nighthawk	Chordeiles gundlachii	Generalist
236	Yes	Chuck-will's-widow	Antrostomus carolinensis	Temperate eastern forests; Tropical dry forests
242	Yes	Eastern Whip-poor-will	Antrostomus vociferus	Temperate eastern forests
253	No	Black Swift	Cypseloides niger	Temperate western forests; Mexican pine-oak forests; Mexican highland forests; Montane evergreen forests
260	Yes	Chimney Swift	Chaetura pelagica	Temperate eastern forests
261	No	Vaux's Swift	Chaetura vauxi	Temperate western forests; Mexican highland forests; Tropical dry forests; Tropical evergreen forests
274	No	White-throated Swift	Aeronautes saxatalis	Rocky cliffs; Temperate western forests; Mexican highland forests; Arid montane scrub
332	Yes	Ruby-throated Hummingbird	Archilochus colubris	Temperate eastern forests
333	No	Black-chinned Hummingbird	Archilochus alexandri	Temperate western forests
336	No	Anna's Hummingbird	Calypte anna	Chaparral; Temperate western forests
340	No	Broad-tailed Hummingbird	Selasphorus platycercus	Temperate western forests; Mexican pine-oak forests; Pine-oak forests
341	No	Rufous Hummingbird	Selasphorus rufus	Temperate western forests
346	No	Calliope Hummingbird	Selasphorus calliope	Temperate western forests
512	Yes	American Woodcock	Scolopax minor	Temperate eastern forests
765	No	Black Vulture	Coragyps atratus	Generalist
766	No	Turkey Vulture	Cathartes aura	Generalist
775	Yes	Swallow-tailed Kite	Elanoides forficatus	Temperate eastern forests; Tropical evergreen forests
778	No	Golden Eagle	Aquila chrysaetos	Generalist
789	Yes	Sharp-shinned Hawk	Accipiter striatus	Forest generalist	1
790	Yes	Cooper's Hawk	Accipiter cooperii	Forest generalist	1
793	Yes	Northern Goshawk	Accipiter gentilis	Forest generalist	1
798	Yes	Mississippi Kite	Ictinia mississippiensis	Temperate eastern forests
818	Yes	Red-shouldered Hawk	Buteo lineatus	Temperate eastern forests; Temperate western forests	1
820	Yes	Broad-winged Hawk	Buteo platypterus	Boreal forests; Temperate eastern forests
822	No	Short-tailed Hawk	Buteo brachyurus	Generalist
824	No	Zone-tailed Hawk	Buteo albonotatus	Mexican pine-oak forests; Temperate western forests; Gallery forests
825	Yes	Red-tailed Hawk	Buteo jamaicensis	Generalist	1
831	No	Flammulated Owl	Psiloscops flammeolus	Temperate western forests; Mexican pine-oak forests; Pine forests
832	No	Western Screech-Owl	Megascops kennicottii	Temperate western forests; Desert scrub
833	Yes	Eastern Screech-Owl	Megascops asio	Temperate eastern forests; Tropical dry forests
845	Yes	Great Horned Owl	Bubo virginianus	Generalist	1
847	Yes	Northern Hawk Owl	Surnia ulula	Boreal forests		1
848	No	Northern Pygmy-Owl	Glaucidium gnoma	Temperate western forests; Mexican pine-oak forests; Pine-oak forests
859	No	Spotted Owl	Strix occidentalis	Temperate western forests; Mexican highland forests
860	Yes	Barred Owl	Strix varia	Forest generalist	1
862	Yes	Great Gray Owl	Strix nebulosa	Boreal forests		1
863	Yes	Long-eared Owl	Asio otus	Forest generalist	1
868	Yes	Boreal Owl	Aegolius funereus	Boreal forests		1
869	Yes	Northern Saw-whet Owl	Aegolius acadicus	Forest generalist	1
935	No	Lewis's Woodpecker	Melanerpes lewis	Temperate western forests
938	Yes	Red-headed Woodpecker	Melanerpes erythrocephalus	Temperate eastern forests
939	No	Acorn Woodpecker	Melanerpes formicivorus	Mexican pine-oak forests; Temperate western; Pine-oak forests
950	No	Golden-fronted Woodpecker	Melanerpes aurifrons	Forest generalist
951	Yes	Red-bellied Woodpecker	Melanerpes carolinus	Temperate eastern forests
953	No	Williamson's Sapsucker	Sphyrapicus thyroideus	Temperate western forests
954	Yes	Yellow-bellied Sapsucker	Sphyrapicus varius	Temperate eastern forests; Boreal forests
955	No	Red-naped Sapsucker	Sphyrapicus nuchalis	Temperate western forests
956	No	Red-breasted Sapsucker	Sphyrapicus ruber	Temperate western forests
958	Yes	American Three-toed Woodpecker	Picoides dorsalis	Boreal forests
959	Yes	Black-backed Woodpecker	Picoides arcticus	Boreal forests
961	Yes	Downy Woodpecker	Dryobates pubescens	Forest generalist	1
962	No	Nuttall's Woodpecker	Dryobates nuttallii	Temperate western forests
964	Yes	Red-cockaded Woodpecker	Dryobates borealis	Temperate eastern forests
965	Yes	Hairy Woodpecker	Dryobates villosus	Forest generalist	1
966	No	White-headed Woodpecker	Dryobates albolarvatus	Temperate western forests
977	Yes	Northern Flicker	Colaptes auratus	Forest generalist	1
983	Yes	Pileated Woodpecker	Dryocopus pileatus	Temperate eastern forests; Temperate western forests	1
1000	Yes	Merlin	Falco columbarius	Generalist	1
1006	Yes	Peregrine Falcon	Falco peregrinus	Generalist	1
1247	No	Ash-throated Flycatcher	Myiarchus cinerascens	Desert scrub; Desert riparian; Temperate western forests
1249	Yes	Great Crested Flycatcher	Myiarchus crinitus	Temperate eastern forests
1259	No	Great Kiskadee	Pitangus sulphuratus	Generalist
1273	No	Tropical Kingbird	Tyrannus melancholicus	Forest generalist; Agricultural
1275	No	Cassin's Kingbird	Tyrannus vociferans	Mexican pine-oak forests; Temperate western forests; Pine-oak forests
1278	Yes	Eastern Kingbird	Tyrannus tyrannus	Temperate grasslands; Temperate eastern forests; Agricultural
1291	Yes	Olive-sided Flycatcher	Contopus cooperi	Boreal forests; Temperate western forests	1
1295	No	Western Wood-Pewee	Contopus sordidulus	Temperate western forests; Mexican pine-oak forests; Pine-oak forests
1296	Yes	Eastern Wood-Pewee	Contopus virens	Temperate eastern forests
1302	Yes	Yellow-bellied Flycatcher	Empidonax flaviventris	Boreal forests; Temperate eastern forests
1303	Yes	Acadian Flycatcher	Empidonax virescens	Temperate eastern forests
1304	Yes	Alder Flycatcher	Empidonax alnorum	Boreal forests; Temperate eastern forests
1305	Yes	Willow Flycatcher	Empidonax traillii	Temperate eastern forests; Temperate western forests	1
1307	Yes	Least Flycatcher	Empidonax minimus	Temperate eastern forests; Boreal forests
1308	No	Hammond's Flycatcher	Empidonax hammondii	Temperate western forests
1309	No	Gray Flycatcher	Empidonax wrightii	Temperate western forests
1310	No	Dusky Flycatcher	Empidonax oberholseri	Temperate western forests
1312	No	Pacific-slope Flycatcher	Empidonax difficilis	Temperate western forests
1313	No	Cordilleran Flycatcher	Empidonax occidentalis	Temperate western forests; Mexican pine-oak forests
1318	Yes	Eastern Phoebe	Sayornis phoebe	Temperate eastern forests
1319	No	Say's Phoebe	Sayornis saya	Desert scrub; Temperate western forests
1340	Yes	White-eyed Vireo	Vireo griseus	Temperate eastern forests
1349	No	Bell's Vireo	Vireo bellii	Desert scrub; Desert riparian; Temperate eastern forests
1350	No	Gray Vireo	Vireo vicinior	Temperate western forests
1351	No	Hutton's Vireo	Vireo huttoni	Temperate western forests; Mexican pine-oak forests; Pine-oak forests
1352	Yes	Yellow-throated Vireo	Vireo flavifrons	Temperate eastern forests
1354	No	Cassin's Vireo	Vireo cassinii	Temperate western forests
1355	Yes	Blue-headed Vireo	Vireo solitarius	Boreal forests; Temperate eastern forests
1356	No	Plumbeous Vireo	Vireo plumbeus	Temperate western forests; Mexican pine-oak forests; Pine-oak forests
1357	Yes	Philadelphia Vireo	Vireo philadelphicus	Boreal forests
1358	Yes	Warbling Vireo	Vireo gilvus	Temperate eastern forests; Temperate western forests	1
1360	Yes	Red-eyed Vireo	Vireo olivaceus	Temperate eastern forests; Boreal forests; Temperate western forests	1
1364	Yes	Canada Jay	Perisoreus canadensis	Boreal forests
1380	No	Pinyon Jay	Gymnorhinus cyanocephalus	Temperate western forests
1381	No	Steller's Jay	Cyanocitta stelleri	Temperate western forests; Mexican pine-oak forests; Pine forests
1382	Yes	Blue Jay	Cyanocitta cristata	Temperate eastern forests
1385	No	California Scrub-Jay	Aphelocoma californica	Temperate western forests; Mexican pine-oak forests
1386	No	Woodhouse's Scrub-Jay	Aphelocoma woodhouseii	Temperate western forests; Mexican pine-oak forests
1390	No	Clark's Nutcracker	Nucifraga columbiana	Temperate western forests
1391	No	Black-billed Magpie	Pica hudsonia	Generalist
1392	No	Yellow-billed Magpie	Pica nuttalli	Temperate western forests
1396	No	Northwestern Crow	Corvus caurinus	Temperate western forests
1404	No	Fish Crow	Corvus ossifragus	Generalist
1413	No	Purple Martin	Progne subis	Generalist
1420	No	Tree Swallow	Tachycineta bicolor	Generalist
1423	No	Violet-green Swallow	Tachycineta thalassina	Temperate western forests; Mexican pine-oak forests; desert scrub; Pine forests
1428	No	Northern Rough-winged Swallow	Stelgidopteryx serripennis	Generalist
1430	No	Bank Swallow	Riparia riparia	Generalist
1431	No	Cliff Swallow	Petrochelidon pyrrhonota	Generalist
1435	Yes	Carolina Chickadee	Poecile carolinensis	Temperate eastern forests
1436	Yes	Black-capped Chickadee	Poecile atricapillus	Temperate eastern forests; Boreal forests; Temperate western forests	1
1437	No	Mountain Chickadee	Poecile gambeli	Temperate western forests
1439	No	Chestnut-backed Chickadee	Poecile rufescens	Temperate western forests
1440	Yes	Boreal Chickadee	Poecile hudsonicus	Boreal forests
1441	Yes	Gray-headed Chickadee	Poecile cinctus	Boreal forests		1
1443	No	Oak Titmouse	Baeolophus inornatus	Temperate western forests
1444	No	Juniper Titmouse	Baeolophus ridgwayi	Temperate western forests
1445	Yes	Tufted Titmouse	Baeolophus bicolor	Temperate eastern forests
1448	No	Bushtit	Psaltriparus minimus	Temperate western forests; Mexican pine-oak forests; Pine-oak forests
1449	Yes	Red-breasted Nuthatch	Sitta canadensis	Boreal forests; Temperate western forests; Temperate eastern forests	1
1450	Yes	White-breasted Nuthatch	Sitta carolinensis	Temperate eastern forests; Temperate western forests; Mexican pine-oak forests	1
1451	No	Pygmy Nuthatch	Sitta pygmaea	Temperate western forests; Mexican pine-oak forests
1452	Yes	Brown-headed Nuthatch	Sitta pusilla	Temperate eastern forests
1453	Yes	Brown Creeper	Certhia americana	Forest generalist	1
1461	Yes	House Wren	Troglodytes aedon	Forest generalist	1
1466	No	Pacific Wren	Troglodytes pacificus	Temperate western forests
1467	Yes	Winter Wren	Troglodytes hiemalis	Boreal forests; Temperate eastern forests
1471	Yes	Carolina Wren	Thryothorus ludovicianus	Temperate eastern forests
1472	No	Bewick's Wren	Thryomanes bewickii	Desert scrub; Chaparral; Temperate western forests
1506	Yes	Blue-gray Gnatcatcher	Polioptila caerulea	Temperate eastern forests; Temperate western forests	1
1514	No	American Dipper	Cinclus mexicanus	Temperate western forests
1517	Yes	Golden-crowned Kinglet	Regulus satrapa	Boreal forests; Temperate western forests; Temperate eastern forests; Mexican highland forests	1
1518	Yes	Ruby-crowned Kinglet	Regulus calendula	Boreal forests; Temperate western forests	1
1557	Yes	Eastern Bluebird	Sialia sialis	Temperate eastern forests; Mexican pine-oak forests; Pine-oak forests
1558	No	Western Bluebird	Sialia mexicana	Temperate western forests; Mexican pine-oak forests
1559	No	Mountain Bluebird	Sialia currucoides	Temperate western forests; Temperate grasslands
1560	No	Townsend's Solitaire	Myadestes townsendi	Temperate western forests; Mexican pine-oak forests
1580	Yes	Veery	Catharus fuscescens	Temperate eastern forests; Boreal forests; Temperate western forests	1
1581	Yes	Gray-cheeked Thrush	Catharus minimus	Boreal forests		1
1582	Yes	Bicknell's Thrush	Catharus bicknelli	Boreal forests
1583	Yes	Swainson's Thrush	Catharus ustulatus	Boreal forests; Temperate western forests	1
1584	Yes	Hermit Thrush	Catharus guttatus	Temperate eastern forests; Boreal forests; Temperate western forests	1
1585	Yes	Wood Thrush	Hylocichla mustelina	Temperate eastern forests
1603	Yes	American Robin	Turdus migratorius	Forest generalist	1
1609	Yes	Varied Thrush	Ixoreus naevius	Temperate western forests; Boreal forests	1
1614	Yes	Gray Catbird	Dumetella carolinensis	Temperate eastern forests; Temperate western forests	1
1622	Yes	Brown Thrasher	Toxostoma rufum	Temperate eastern forests
1634	No	Northern Mockingbird	Mimus polyglottos	Generalist
1637	Yes	Bohemian Waxwing	Bombycilla garrulus	Boreal forests		1
1638	Yes	Cedar Waxwing	Bombycilla cedrorum	Forest generalist	1
1701	Yes	Evening Grosbeak	Coccothraustes vespertinus	Boreal forests; Temperate western forests; Mexican pine-oak forests	1
1743	Yes	Pine Grosbeak	Pinicola enucleator	Boreal forests		1
1749	Yes	House Finch	Haemorhous mexicanus	Generalist	1
1750	Yes	Purple Finch	Haemorhous purpureus	Boreal forests; Temperate western forests; Temperate eastern forests	1
1751	No	Cassin's Finch	Haemorhous cassinii	Temperate western forests
1754	No	Common Redpoll	Acanthis flammea	Arctic tundra; Alpine tundra; Boreal forests
1757	Yes	Red Crossbill	Loxia curvirostra	Temperate western forests; Mexican pine-oak forests; Temperate eastern forests; Pine forests	1	1
1760	Yes	White-winged Crossbill	Loxia leucoptera	Boreal forests		1
1763	Yes	Pine Siskin	Spinus pinus	Boreal forests; Temperate western forests; Mexican pine-oak forests	1
1769	No	Lesser Goldfinch	Spinus psaltria	Forest generalist
1771	Yes	American Goldfinch	Spinus tristis	Temperate eastern forests; Temperate western forests	1
1805	No	Spotted Towhee	Pipilo maculatus	Temperate western forests; Mexican pine-oak forests; Pine-oak forests
1806	Yes	Eastern Towhee	Pipilo erythrophthalmus	Temperate eastern forests
1825	Yes	Bachman's Sparrow	Peucaea aestivalis	Temperate eastern forests
1828	No	American Tree Sparrow	Spizelloides arborea	Arctic tundra; Boreal forests
1829	Yes	Chipping Sparrow	Spizella passerina	Forest generalist	1
1832	Yes	Field Sparrow	Spizella pusilla	Temperate eastern forests
1851	Yes	Fox Sparrow	Passerella iliaca	Boreal forests; Temperate western forests	1
1852	Yes	Song Sparrow	Melospiza melodia	Generalist	1
1853	Yes	Lincoln's Sparrow	Melospiza lincolnii	Boreal forests; Temperate western forests	1
1856	Yes	White-throated Sparrow	Zonotrichia albicollis	Boreal forests
1857	No	Harris's Sparrow	Zonotrichia querula	Arctic tundra; Boreal forests
1858	Yes	White-crowned Sparrow	Zonotrichia leucophrys	Arctic tundra; Boreal forests; Temperate western forests	1
1859	No	Golden-crowned Sparrow	Zonotrichia atricapilla	Arctic tundra; Boreal forests
1861	Yes	Dark-eyed Junco	Junco hyemalis	Boreal forests; Temperate western forests; Temperate eastern forests	1
1885	Yes	Yellow-breasted Chat	Icteria virens	Temperate eastern forests; Temperate western forests	1
1909	Yes	Orchard Oriole	Icterus spurius	Temperate eastern forests
1916	No	Bullock's Oriole	Icterus bullockii	Temperate western forests; Mexican pine-oak forests; Gallery forests
1922	Yes	Baltimore Oriole	Icterus galbula	Temperate eastern forests
1931	No	Shiny Cowbird	Molothrus bonariensis	Generalist
1937	Yes	Rusty Blackbird	Euphagus carolinus	Boreal forests
1947	Yes	Ovenbird	Seiurus aurocapilla	Temperate eastern forests; Boreal forests; Temperate western forests	1
1948	Yes	Worm-eating Warbler	Helmitheros vermivorum	Temperate eastern forests
1949	Yes	Louisiana Waterthrush	Parkesia motacilla	Temperate eastern forests
1950	Yes	Northern Waterthrush	Parkesia noveboracensis	Boreal forests; Temperate western forests; Temperate eastern forests	1
1952	Yes	Golden-winged Warbler	Vermivora chrysoptera	Temperate eastern forests
1953	Yes	Blue-winged Warbler	Vermivora cyanoptera	Temperate eastern forests
1954	Yes	Black-and-white Warbler	Mniotilta varia	Temperate eastern forests; Boreal forests
1955	Yes	Prothonotary Warbler	Protonotaria citrea	Temperate eastern forests
1956	Yes	Swainson's Warbler	Limnothlypis swainsonii	Temperate eastern forests
1959	Yes	Tennessee Warbler	Oreothlypis peregrina	Boreal forests
1960	Yes	Orange-crowned Warbler	Oreothlypis celata	Temperate western forests; Boreal forests	1
1963	Yes	Nashville Warbler	Oreothlypis ruficapilla	Boreal forests; Temperate western forests; Temperate eastern forests	1
1964	No	Virginia's Warbler	Oreothlypis virginiae	Temperate western forests
1966	Yes	Connecticut Warbler	Oporornis agilis	Boreal forests
1968	No	MacGillivray's Warbler	Geothlypis tolmiei	Temperate western forests
1969	Yes	Mourning Warbler	Geothlypis philadelphia	Boreal forests; Temperate eastern forests
1970	Yes	Kentucky Warbler	Geothlypis formosa	Temperate eastern forests
1976	Yes	Common Yellowthroat	Geothlypis trichas	Generalist	1
1982	Yes	Hooded Warbler	Setophaga citrina	Temperate eastern forests
1983	Yes	American Redstart	Setophaga ruticilla	Temperate eastern forests; Boreal forests; Temperate western forests	1
1984	Yes	Kirtland's Warbler	Setophaga kirtlandii	Temperate eastern forests
1985	Yes	Cape May Warbler	Setophaga tigrina	Boreal forests
1986	Yes	Cerulean Warbler	Setophaga cerulea	Temperate eastern forests
1987	Yes	Northern Parula	Setophaga americana	Temperate eastern forests; Boreal forests
1989	Yes	Magnolia Warbler	Setophaga magnolia	Boreal forests; Temperate eastern forests
1990	Yes	Bay-breasted Warbler	Setophaga castanea	Boreal forests
1991	Yes	Blackburnian Warbler	Setophaga fusca	Boreal forests; Temperate eastern forests
1992	Yes	Yellow Warbler	Setophaga petechia	Temperate eastern forests; Boreal forests; Temperate western forests	1
1993	Yes	Chestnut-sided Warbler	Setophaga pensylvanica	Temperate eastern forests; Boreal forests
1994	Yes	Blackpoll Warbler	Setophaga striata	Boreal forests
1995	Yes	Black-throated Blue Warbler	Setophaga caerulescens	Boreal forests; Temperate eastern forests
1996	Yes	Palm Warbler	Setophaga palmarum	Boreal forests
1998	Yes	Pine Warbler	Setophaga pinus	Temperate eastern forests
1999	Yes	Yellow-rumped Warbler	Setophaga coronata	Boreal forests; Temperate western forests; Temperate eastern forests	1
2000	Yes	Yellow-throated Warbler	Setophaga dominica	Temperate eastern forests
2003	Yes	Prairie Warbler	Setophaga discolor	Temperate eastern forests
2008	No	Black-throated Gray Warbler	Setophaga nigrescens	Temperate western forests; Mexican pine-oak forests
2009	Yes	Townsend's Warbler	Setophaga townsendi	Temperate western forests; Boreal forests	1
2010	No	Hermit Warbler	Setophaga occidentalis	Temperate western forests
2011	No	Golden-cheeked Warbler	Setophaga chrysoparia	Temperate western forests
2012	Yes	Black-throated Green Warbler	Setophaga virens	Boreal forests; Temperate eastern forests
2022	Yes	Canada Warbler	Cardellina canadensis	Boreal forests; Temperate eastern forests
2023	Yes	Wilson's Warbler	Cardellina pusilla	Boreal forests; Temperate western forests	1
2033	Yes	Summer Tanager	Piranga rubra	Temperate eastern forests; Temperate western forests	1
2034	Yes	Scarlet Tanager	Piranga olivacea	Temperate eastern forests
2035	No	Western Tanager	Piranga ludoviciana	Temperate western forests
2047	Yes	Northern Cardinal	Cardinalis cardinalis	Temperate eastern forests; Tropical dry forests; Desert scrub
2051	Yes	Rose-breasted Grosbeak	Pheucticus ludovicianus	Temperate eastern forests
2052	No	Black-headed Grosbeak	Pheucticus melanocephalus	Temperate western forests; Mexican pine-oak forests
2058	Yes	Blue Grosbeak	Passerina caerulea	Temperate eastern forests; Tropical dry forests; Temperate western forests	1
2059	No	Lazuli Bunting	Passerina amoena	Temperate western forests
2060	Yes	Indigo Bunting	Passerina cyanea	Temperate eastern forests
2064	Yes	Painted Bunting	Passerina ciris	Temperate eastern forests; Desert scrub
